# Estimation of Cross-Species Introgression Rates using Genomic Data Despite Model Unidentifiability

Ziheng Yang<sup>a,1</sup> and Tomáš Flouri<sup>a</sup>

<sup>a</sup>Department of Genetics, Evolution and Environment, University College London, Gower Street, London WC1E 6BT, UK

This manuscript was compiled on August 14, 2021

1 **The multispecies coalescent with introgression (MSci) model accom-**  
2 **modates both the coalescent process and cross-species introgres-**  
3 **sion/hybridization events, two major processes that create genealogi-**  
4 **cal fluctuations across the genome and gene-tree–species-tree dis-**  
5 **cordance. Full likelihood implementations of the MSci model take**  
6 **such fluctuations as a major source of information about the history**  
7 **of species divergence and gene flow, and provide a powerful tool for**  
8 **estimating the direction, timing and strength of cross-species intro-**  
9 **gression using multilocus sequence data. However, introgression**  
10 **models, in particular those that accommodate bidirectional intro-**  
11 **gression (BDI), are known to cause unidentifiability issues of the**  
12 **label-switching type, whereby different models or parameters make**  
13 **the same predictions about the genomic data and thus cannot be dis-**  
14 **tinguished by the data. Nevertheless, there has been no systematic**  
15 **study of unidentifiability when full likelihood methods are applied.**  
16 **Here we characterize the unidentifiability of arbitrary BDI models**  
17 **and derive simple rules for its identification. In general, an MSci**  
18 **model with  $k$  BDI events has  $2^k$  unidentifiable towers in the posterior,**  
19 **with each BDI event between sister species creating within-model**  
20 **unidentifiability and each BDI between non-sister species creating**  
21 **cross-model unidentifiability. We develop novel algorithms for pro-**  
22 **cessing Markov chain Monte Carlo (MCMC) samples to remove label**  
23 **switching and implement them in the BPP program. We analyze ge-**  
24 **nomomic sequence data from *Heliconius* butterflies as well as synthetic**  
25 **data to illustrate the utility of the BDI models and the new algorithms.**

Multispecies coalescent | introgression | unidentifiability | BPP | MSci | label-switching

1 **G**enomic sequences sampled from modern species contain rich  
2 historical information concerning species divergences and cross-  
3 species gene flow. In the past two decades, analysis of genomic se-  
4 quence data has demonstrated the widespread nature of cross-species  
5 hybridization or introgression (1, 2). A number of statistical meth-  
6 ods have been developed to infer introgression using genomic data,  
7 most of which use data summaries such as the estimated gene trees  
8 (3–5). Full-likelihood methods applied directly to multi-locus se-  
9 quence alignments (6–8) allow estimation of evolutionary parameters  
10 including the timing and strength of introgression, as well as species  
11 divergence times and population sizes for modern and extinct ances-  
12 tral species. These have moved the field far beyond simply testing for  
13 the presence of cross-species gene flow.

14 Models of cross-species introgression are known to cause unidenti-  
15 fiability issues, whereby different introgression models make the same  
16 probabilistic predictions about multilocus sequence data, and cannot  
17 be distinguished by such data (9–12). If the probability distributions  
18 of the data are identical under model  $m$  with parameters  $\Theta$  and under  
19 model  $m'$  with parameters  $\Theta'$ , with

$$f(X|m, \Theta) = f(X|m', \Theta') \quad [1]$$

21 for essentially all possible data  $X$ , the models are unidentifiable by  
22 data  $X$ . Here we use the term *within-model unidentifiability* if  $m = m'$   
23 and  $\Theta \neq \Theta'$ , or *cross-model unidentifiability* if  $m \neq m'$ . In the former  
24 case, two sets of parameter values in the same model are unidentifiable,  
25 whereas in the latter, two distinct models are unidentifiable. There  
26 have been very limited studies of unidentifiability of introgression  
27 models, which examined heuristic methods that use gene tree topolo-  
28 gies (either rooted or unrooted) as data (10–12), but the issue has  
29 not been studied when full-likelihood methods are applied. Note that  
30 unidentifiability depends on the data and the method of analysis. An  
31 introgression model unidentifiable given gene tree topologies alone  
32 may be identifiable given gene trees with coalescent times. Similarly,  
33 a model unidentifiable using heuristic methods may be identifiable  
34 when full likelihood methods are applied to the same data. It is thus  
35 important to study the problem when full likelihood methods are  
36 applied, because unidentifiability by a heuristic method may reflect  
37 its inefficient use of information in the data rather than the intrinsic  
38 difficulty of the inference problem (13).

39 Among the different types of MSci models developed (6–8), the  
40 bidirectional-introgression (BDI) model (or model D in (8), fig. 1a) is  
41 one of the most useful in real data analysis (e.g., 14, 15). The basic  
42 BDI model for two species involves nine parameters, with  $\Theta = (\theta_A, \theta_B,$   
43  $\theta_X, \theta_Y, \theta_R, \tau_X, \tau_Y, \varphi_X, \varphi_Y)$  (fig. 1a). Note that an introgression model  
44 is similar to a species tree except that there are hybridization nodes  
45 representing cross-species introgressions, besides speciation nodes  
46 representing species divergences. While a speciation node has one  
47 parent and two daughters, a hybridization node has two parents and  
48 one daughter. The introgression probabilities ( $\varphi$  and  $1 - \varphi$ ) describe  
49 the contributions of the two parental populations to the hybrid species.  
50 When we trace the genealogical history of a sample of sequences from  
51 the modern species backwards in time and reach a hybridization node,  
52 each of the sequences takes the two parental paths with probabilities  $\varphi$   
53 and  $1 - \varphi$ . There are thus three types of parameters in an introgression  
54 (or MSci) model: the times of species divergence and introgression  
55 ( $\tau$ s), the (effective) population sizes of modern and ancestral species  
56 ( $\theta$ s), and the introgression probabilities ( $\varphi$ s). Both the divergence  
57 times ( $\tau$ s) and population sizes ( $\theta$ s) are measured in the expected  
58 number of mutations per site.

59 The BDI model, in the case of two species (fig. 1), is noted to  
60 have an unidentifiability issue (8). Let  $\Theta'$  be a set of parameters  
61 with the same values as  $\Theta$  except that  $\varphi'_X = 1 - \varphi_X$ ,  $\varphi'_Y = 1 - \varphi_Y$ ,  
62  $\theta'_X = \theta_Y$ , and  $\theta'_Y = \theta_X$ . Then  $f(G|\Theta) = f(G|\Theta')$  for any gene tree  $G$   
63 (fig. 1b&c). Thus for every point  $\Theta$  in the parameter space, there is  
64 a ‘mirror’ point  $\Theta'$  with exactly the same likelihood. With  $\Theta$ , the A

ZY and TF conceived the research, designed and conducted the experiment, and wrote the paper.

No competing interests are declared.

<sup>2</sup>To whom correspondence should be addressed. E-mail: z.yang@ucl.ac.uk

65 sequences take the left (upper) path at  $X$  and enter population  $RX$  with  
66 probability  $1 - \phi_X$ , coalescing at the rate  $\frac{2}{\theta_X}$ , while with  $\Theta'$ , the same  
67  $A$  sequences may take the right (horizontal) path and enter population  
68  $RY$  with probability  $\phi_X' = 1 - \phi_X$ , coalescing at the rate  $\frac{2}{\theta_Y'} = \frac{2}{\theta_X}$ . The  
69 differences between  $\Theta$  and  $\Theta'$  are in the labelling, with 'left' and  $X$   
70 under  $\Theta$  corresponding to 'right' and  $Y$  under  $\Theta'$ , but the probabilities  
71 involved are the same. The same argument applies to sequences from  
72  $B$  going through node  $Y$ , and to any numbers of sequences from  $A$  and  
73  $B$  considered jointly. Thus  $f(G|\Theta) = f(G|\Theta')$  for essentially all  $G$ .  
74 If the priors on  $\phi_X$  and  $\phi_Y$  are symmetrical, say  $\phi \sim \text{beta}(\alpha, \alpha)$ , the  
75 posterior density will satisfy  $f(\Theta|X) = f(\Theta'|X)$  for all  $X$ . Otherwise  
76 the "twin towers" may not have exactly the same height.

77 The situation is very similar to the label-switching problem in  
78 Bayesian clustering (16–19). Consider data  $X = \{x_i\}$  as a sample  
79 from a mixture of two normal distributions,  $\mathbb{N}(\mu_1, 1)$  and  $\mathbb{N}(\mu_2, 1)$   
80 with the mixing proportions  $p_1$  and  $1 - p_1$ . Let  $\Theta = (p_1, \mu_1, \mu_2)$  be  
81 the parameter vector. Then  $\Theta' = (1 - p_1, \mu_2, \mu_1)$  will have exactly  
82 the same likelihood, with  $f(X|\Theta) = f(X|\Theta')$  for essentially all data  
83  $X$ . In effect, the labels 'group 1' and 'group 2' are switched between  
84  $\Theta$  and  $\Theta'$ .

85 As an example, we fit the BDI model of figure 2a to the first  
86 500 noncoding loci on chromosome 1 in the genomic data from  
87 three *Heliconius* butterfly species: *H. melpomene*, *H. timareta*, and  
88 *H. numata* (14, 20). Figure 3a shows the trace plots for parameters  
89  $\phi_X$  and  $\phi_Y$  from a Markov chain Monte Carlo (MCMC) run. The  
90 Markov chain moves between two peaks, centered around  $(\phi_X, \phi_Y) =$   
91  $(0.35, 0.1)$  and  $(0.65, 0.9)$ , respectively. In effect, the algorithm is  
92 switching between  $\Theta$  and  $\Theta'$  and changing the definition of parameters.  
93 This is a label-switching problem, as occurs in Bayesian clustering.  
94 The usual practice of estimating parameters by their posterior means  
95 (which are 0.54 for  $\phi_X$  and 0.62 for  $\phi_Y$  in fig. 3a) and constructing the  
96 credibility intervals is inappropriate. Indeed the posterior distribution  
97 of  $\Theta$  is exactly symmetrical with twin towers, and if the chain is run  
98 long enough, the posterior means of  $\phi_X$  and  $\phi_Y$  will be exactly  $\frac{1}{2}$ .  
99 The results are similar when the first 500 exonic loci are analyzed, in  
100 which the Markov chain moves between two towers centered around  
101  $(0.3, 0.1)$  and  $(0.7, 0.9)$  (fig. S1a).

102 Unidentifiable models cannot be applied to real data as they are  
103 trying to "distinguish the indistinguishable" (10). Results such as  
104 those of figures 3a & S1a raise two questions. First, are BDI models  
105 with more than two species or two BDI events unidentifiable, and  
106 what are the rules? Second how do we deal with the problem of  
107 label-switching and make the models useful for real data analyses?  
108 Those two problems are addressed in this paper. We study the unidentifiability  
109 issue of BDI models for an arbitrary number of species with  
110 an arbitrary species tree, when a full-likelihood method is applied  
111 to multilocus sequence data. It has been conjectured that an MSci  
112 model is identifiable by full likelihood methods using data of multi-  
113 locus sequence alignments if and only if it is identifiable when the  
114 data consist of gene trees with coalescent times (8). We make use  
115 of this conjecture and consider two BDI models to be unidentifiable  
116 if and only if they generate the same distribution of gene trees with  
117 coalescent times. We identify general rules for the unidentifiability of  
118 the BDI models. We then develop new algorithms for post-processing  
119 the MCMC samples generated from a Bayesian analysis under the  
120 BDI model to remove the label-switching. Those advancements make  
121 the BDI models usable for real data analysis despite their unidentifiability.  
122 We use the BPP program to analyze synthetic datasets as well  
123 as genomic data from *Heliconius* butterflies to demonstrate the utility  
124 of the BDI models and the new algorithms.

## Theory

**The rule of unidentifiability of BDI models.** Suppose species  
125  $A$  and  $B$  exchange migrants at time  $\tau_X = \tau_Y$  through bidirectional  
126 introgression (fig. 4). To study the backwards-in-time process of  
127 coalescent and introgression, we can treat nodes  $X$  and  $Y$  as one  
128 node,  $XY$ . When sequences from  $A$  reach node  $XY$ , each of them has  
129 probability  $1 - \phi_X$  of taking the left parental path ( $RX$ ) and probability  
130  $\phi_X$  of taking the right parental path ( $SY$ ). Similarly when sequences  
131 from  $B$  reach node  $XY$ , they have probabilities  $\phi_Y$  and  $1 - \phi_Y$  of taking  
132 the left ( $RX$ ) and right ( $YS$ ) parental paths, respectively. If we swap  
133 branches  $A$  and  $B$ , carrying their population size parameters ( $\theta$ ) and  
134 introgression probabilities ( $\phi$ ) in the process, the probability density  
135 of the gene-trees remains unchanged. Thus the species tree-parameter  
136 combinations  $(S, \Theta)$  and  $(S', \Theta')$  of figure 4b&c are unidentifiable.  
137 The processes of coalescent and introgression before reaching nodes  
138  $A$  and  $B$  are identical between  $\Theta$  and  $\Theta'$ , as are the processes past  
139 nodes  $X$  and  $Y$ . For example, the rule still applies if each of  $A$  and  $B$  is  
140 a subtree, with introgression events inside, or if there are introgression  
141 events involving a descendant of  $A$  and a descendant of  $B$ .  
142

143 In the case of two species, the parental species  $R$  and  $S$  (fig. 4)  
144 are one node, and the species trees  $(A, B)$  and  $(B, A)$  are the same. As  
145 a result,  $\Theta$  and  $\Theta'$  in figure 4 correspond to two sets of parameter values  
146 in the same model, so this is a case of within-model unidentifiability.  
147 Otherwise the unidentifiability will be cross-model.  
148

**Canonical cases of BDI models.** Here we study major BDI models  
149 to illustrate the rule of unidentifiability and to provide reference for  
150 researchers who may apply those models to analyze genomic datasets.

151 If we add subtrees onto branches  $XA$ ,  $YB$ , or the root branch  $R$  in  
152 the two-species tree of figure 1a, so that the BDI event remains to  
153 be between two sister species, the model will exhibit within-model  
154 parameter unidentifiability (fig. S2), just like the basic model of figure  
155 1a.  
156

157 If the BDI event is between non-sister species, the model exhibits  
158 cross-model unidentifiability. Figures S3a&a' show a model with a  
159 BDI event between cousins, while in figures S3b&b', the two species  
160 involved in the BDI event are more distantly related.

161 Figures S4a, b & c show three models each with a BDI event  
162 between non-sister species. In figure S4a,  $X$  and  $Y$  are non-sister  
163 species on the original binary species tree. In figure S4b&c,  $X$  and  $Y$   
164 are non-sister species because there are introgression events involving  
165 branches  $RX$  and/or  $RY$ . In all three cases, there is cross-model  
166 unidentifiability, with the twin towers shown in S4a', b', & c'.

167 The case of two non-sister BDI events for three species is illus-  
168 trated in figure S5. According to our rule, there are four unidentifiable  
169 models in the posterior, with parameter mappings shown in figure S5.  
170 One way of seeing that the four models are equivalent or unidentifi-  
171 able is to assume that the introgression probabilities ( $\phi_X$ ,  $\phi_Y$ ,  $\phi_Z$ ,  
172 and  $\phi_W$ ) are all  $< \frac{1}{2}$ , and then work out the major routes taken when  
173 we trace the genealogical history of sequences sampled from modern  
174 species. In such cases, all four models of figure S5 predict the fol-  
175 lowing: most sequences from  $A$  will take the route  $ZR$  at node  $ZW$   
176 with probability  $1 - \gamma$ ; most sequences from  $B$  will take the route  
177  $X-W$  at node  $XY$  (with probability  $1 - \alpha$ ), then the route  $WS$  at node  
178  $ZW$  (with probability  $1 - \delta$ ), before reaching  $SR$ ; and most sequences  
179 from  $C$  will take the route  $YS$  at node  $XY$  (with probability  $1 - \beta$ ,  
180 before reaching  $SR$ . Of course the four models are unidentifiable  
181 whatever values the introgression probabilities take. Those models  
182 have been used to analyze genomic data from Texas horned lizard  
183 (*Phrynosoma cornutum*) (15).

184 Figure 5 shows two models for five species, each model involving

185 three BDI events. In figure 5a, all three BDI events involve sister  
 186 species, so that there are  $2^3 = 8$  unidentifiable within-model towers in  
 187 the posterior. In figure 5b, one BDI event involves non-sister species  
 188 while two involve sister species, so that there are two unidentifiable  
 189 models, each of which has four unidentifiable within-model towers in  
 190 the posterior.

191 In general, if there are  $m$  BDI events between sister species and  $n$   
 192 BDI events between non-sister species, there will be  $2^m$  unidentifiable  
 193 models, each having  $2^n$  within-model unidentifiable towers.

194 **Unidentifiability of double-DBI models.** Figure 6a shows two BDI  
 195 events between species  $A$  and  $B$ , which occurred at times  $\tau_X = \tau_Y$  and  
 196  $\tau_Z = \tau_W$ , respectively. To apply the rule of figure 4, we treat  $Z$  and  $W$   
 197 as one node so that  $X$  and  $Y$  are considered sister species. There are  
 198 then four unidentifiable within-model towers in the posterior space,  
 199 shown as  $\Theta_1$ - $\Theta_4$  in fig. 6. The parameter mappings are

| $\Theta$                                                      | $\varphi_X$  | $\varphi_Y$ | $\theta_X$ | $\theta_Y$ | $\varphi_Z$  | $\varphi_W$  | $\theta_Z$ | $\theta_W$ |
|---------------------------------------------------------------|--------------|-------------|------------|------------|--------------|--------------|------------|------------|
| $\Theta_1 : \varphi_X < \frac{1}{2}, \varphi_Z < \frac{1}{2}$ | $\alpha$     | $\beta$     | $\theta_X$ | $\theta_Y$ | $\gamma$     | $\delta$     | $\theta_Z$ | $\theta_W$ |
| $\Theta_2 : \varphi_X < \frac{1}{2}, \varphi_Z > \frac{1}{2}$ | $\alpha$     | $\beta$     | $\theta_X$ | $\theta_Y$ | $1 - \gamma$ | $1 - \delta$ | $\theta_W$ | $\theta_Z$ |
| $\Theta_3 : \varphi_X > \frac{1}{2}, \varphi_W < \frac{1}{2}$ | $1 - \alpha$ | $1 - \beta$ | $\theta_Y$ | $\theta_X$ | $\delta$     | $\gamma$     | $\theta_W$ | $\theta_Z$ |
| $\Theta_4 : \varphi_X > \frac{1}{2}, \varphi_W > \frac{1}{2}$ | $1 - \alpha$ | $1 - \beta$ | $\theta_Y$ | $\theta_X$ | $1 - \delta$ | $1 - \gamma$ | $\theta_Z$ | $\theta_W$ |

201 In general, with  $k$  BDI events between two species, which occurred  
 202 at different time points in the past, there will be  $2^k$  unidentifiable  
 203 within-model towers in the posterior. There may be little information  
 204 in practical datasets to estimate so many parameters: if all sequences  
 205 have coalesced before they reach the ancient introgression events  
 206 near the root of the species tree, the introgression probabilities ( $\varphi$ s)  
 207 and the associated population sizes ( $\theta$ s) will be nearly impossible to  
 208 estimate. Thus we do not consider more than two BDI events between  
 209 two species. Note that even the model with one BDI event is not  
 210 identifiable by heuristic methods that use gene tree topologies only. A  
 211 small simulation is conducted to illustrate the feasibility of applying  
 212 the double-BDI model (fig. 6) to genomic datasets; see Results.

213 **Addressing unidentifiability issues and difficulties with identi-**  
 214 **fiability constraints.** According to our rule, MSci models with BDI  
 215 events can create both within-model and cross-model unidentifiability.  
 216 Cross-model unidentifiability is relatively simple to identify and deal  
 217 with. If the MCMC is run with the MSci model fixed (8), only one  
 218 of the models (e.g., model  $S_1$  with parameters  $\Theta_1$  in fig. S5) is vis-  
 219 ited in the chain. One can then summarize the posterior distribution  
 220 for parameters under that model (which may be smooth and single-  
 221 moded), and the posterior summary may be mapped onto the other  
 222 unidentifiable models according to the rule. See ref. (15) for such an  
 223 application of BDI models of figure S5. If the MCMC is trans-model  
 224 and visits different models in the chain (6, 7), the posterior space is  
 225 symmetrical between the unidentifiable models (such as models  $S_1$ - $S_4$   
 226 of fig. S5). However, such symmetry is unlikely to be achieved in the  
 227 MCMC sample due to well-known mixing difficulties of trans-model  
 228 MCMC algorithms. One may choose to focus on one of the models  
 229 (e.g.,  $S_1$  of fig. S5) and post-process the MCMC sample to map the  
 230 sample onto the chosen model before producing the within-model  
 231 posterior summary. Oftentimes the MCMC may explore the within-  
 232 model posterior space very well, despite difficulties of moving from  
 233 one model to another. In all cases, the researcher has to be aware of  
 234 the unidentifiable models which are equally good explanations of the  
 235 data (see Discussion).

236 Our focus here is on within-model unidentifiability created by BDI  
 237 events between sister species. When there are multiple modes in the

238 posterior, each mode may offer a sensible interpretation of the data,  
 239 but it is inappropriate to merge MCMC samples from different modes,  
 240 or to construct posterior summaries such as the posterior means and  
 241 CIs using MCMC samples that traverse different modes. It is instead  
 242 more appropriate to summarize the samples for each mode.

243 A common strategy for removing label-switching is to apply so-  
 244 called *identifiability constraints*. In the simple BDI model of figure 1,  
 245 any of the following constraints may be applicable:  $\varphi_X < \frac{1}{2}$ ,  $\varphi_Y < \frac{1}{2}$ ,  
 246 and  $\theta_X < \theta_Y$ . Such identifiability constraints may be imposed during  
 247 the MCMC or during post-processing of the MCMC samples. As  
 248 discussed previously (17, 18), such a constraint may be adequate if the  
 249 posterior modes are well separated, but may not work well otherwise.  
 250 For example, when  $\varphi_X$  is far away from  $\frac{1}{2}$  in all MCMC samples,  
 251 it is simple to process the MCMC sample to impose the constraint  
 252  $\varphi_X < \frac{1}{2}$ . This is the case in analyses of the large datasets in this paper,  
 253 for example, when all noncoding and exonic loci from chromosome 1  
 254 of the *Heliconius* data are analyzed (table 1). However, when the pos-  
 255 terior modes are not well-separated (either because the true parameter  
 256 value is close to the boundary defined by the inequality or because the  
 257 data lack information so that the CIs are wide), different identifiability  
 258 constraints can lead to very different parameter posteriors (16), and an  
 259 appropriate constraint may not exist. A serious problem in such cases  
 260 is that imposing an identifiability constraint may generate posterior  
 261 distributions over-represented near the boundary, with seriously bi-  
 262 ased posterior means (17, 18). For example,  $\varphi_X$  may have substantial  
 263 density mass both below and above  $\frac{1}{2}$ , and imposing the constraint  
 264  $\varphi_X < \frac{1}{2}$  will artificially generate high density mass close to  $\varphi_X = \frac{1}{2}$ .  
 265 Similarly the posterior distributions of  $\theta_X$  and  $\theta_Y$  may overlap, so that  
 266 the constraint  $\theta_X < \theta_Y$  may not be appropriate.

267 **New algorithms to process MCMC samples from the BDI model**  
 268 **to remove label switching.** One approach to dealing with label-  
 269 switching problems in Bayesian clustering is *relabelling*. The MCMC  
 270 is run without any constrain, and the MCMC sample is then post-  
 271 processed to remove label-switching, by attempting to move each  
 272 point in the MCMC sample to its alternative unidentifiable positions  
 273 in order to, as far as possible, make the marginal posterior distribu-  
 274 tions smooth and unimodal (17, 18). The processed sample is then  
 275 summarized to generate the posterior of the parameters. Here we  
 276 follow this strategy and implement three relabelling algorithms for  
 277 use with the BDI model.

278 Let  $\Theta = (\varphi_X, \varphi_Y, \theta_X, \theta_Y)$ , which has a mirror point  $\Theta' =$   
 279  $(\varphi'_X, \varphi'_Y, \theta'_X, \theta'_Y) = (1 - \varphi_X, 1 - \varphi_Y, \theta_Y, \theta_X)$  (fig. 1). The other pa-  
 280 rameters in the model are not involved in the unidentifiability and are  
 281 simply copied along. Let  $\Theta_t, t = 1, \dots, N$ , be the  $N$  samples of pa-  
 282 rameters generated by the MCMC algorithm. Each sample is a point  
 283 in the 4-D space. Let  $\sigma_t$  be a transform for point  $t$ , with  $\sigma_t(\Theta_t) = \Theta_t$   
 284 to be the original point, and  $\sigma_t(\Theta_t) = \Theta'$  to be the transformed or  
 285 mirror point (fig. 1b&c). With a slight abuse of notation, we also  
 286 treat  $\sigma_t$  as an indicator, with  $\sigma_t = 0$  and 1 representing  $\Theta_t$  and  $\Theta'_t$ ,  
 287 respectively. For each sample  $t$ , we choose either the original point or  
 288 its mirror point, to make the posterior of the parameters look smooth  
 289 and single-moded as far as possible. The first two algorithms, called  
 290 center-of-gravity algorithms CoG<sub>0</sub> and CoG<sub>N</sub>, loop through two steps.

291 **Algorithms CoG<sub>0</sub> and CoG<sub>N</sub>.** Initialize. For each point  $t, t =$   
 292  $1, \dots, N$ , pick either the original point ( $\Theta_t$ ) or its mirror point ( $\Theta'_t$ ).  
 293 We set  $\sigma_t$  to 0 (for  $\Theta_t$ ) if  $\varphi_X < \frac{1}{2}$  or  $\varphi_Y < \frac{1}{2}$ , or to 1 (for  $\Theta'_t$ ) otherwise.

- 294 • Step 1. Determine the center of gravity, given by the sample  
 295 means of the parameters,  $\mu = (\bar{\varphi}_X, \bar{\varphi}_Y, \bar{\theta}_X, \bar{\theta}_Y)$ .
- 296 • Step 2. For each point  $t = 1, \dots, N$ , compare the current and  
 297 its mirror positions and choose the one closer to the center of

gravity ( $\mu$ ).

In step 2, we use the Euclidean distance

$$d_0(\Theta, \mu) = \left[ \sum_j^4 (\phi_j - \mu_j)^2 \right]^{1/2}, \quad [3]$$

where  $\phi_j$  are the four parameters in  $\Theta$ :  $\phi_X, \phi_Y, \theta_X, \theta_Y$ . This is algorithm CoG<sub>0</sub>.

If we consider different scales in the different dimensions (for example,  $\phi_X$  and  $\theta_X$  may have very different posterior variances), we can calculate the sample variances  $v$  (in addition to the sample means  $\mu$ ) in step 1 and use them as weights to normalize the differences in step 2, with

$$d_N(\Theta, \mu) = \left[ \sum_j^4 \frac{1}{v_j} (\phi_j - \mu_j)^2 \right]^{1/2}. \quad [4]$$

We refer to this as algorithm CoG<sub>N</sub>.

The third algorithm, called the  $\beta$ - $\gamma$  algorithm, follows the rellabelling algorithm in ref. (18) for Bayesian clustering. We use maximum likelihood (ML) to fit the sample  $\{\Theta_t\}$  to independent beta distributions for  $\phi_X$  and  $\phi_Y$  and gamma distributions for  $\theta_X$  and  $\theta_Y$ :

$$f(\Theta; \omega) = b(\phi_X; p_X, q_X) \cdot b(\phi_Y; p_Y, q_Y) \times g(\theta_X; a_X, b_X) \cdot g(\theta_Y; a_Y, b_Y), \quad [5]$$

where

$$b(\phi; p, q) = \frac{1}{B(p, q)} \phi^{p-1} (1-\phi)^{q-1},$$

$$g(\phi; a, b) = \frac{b^a}{\Gamma(a)} \phi^{a-1} e^{-b\phi} \quad [6]$$

are the beta and gamma densities and where  $\omega = (p_X, q_X, p_Y, q_Y, a_X, b_X, a_Y, b_Y)$  is the vector of hyper-parameters.

The log likelihood, as a function of the hyper-parameters  $\omega$  and the transforms  $\sigma = \{\sigma_t\}$ , is

$$\ell(\omega, \sigma) = \sum_t^N \ell_t(\omega, \sigma_t(\Theta_t)) = \sum_t^N \log f(\sigma_t(\Theta_t); \omega). \quad [7]$$

We have implemented the following iterative algorithm to estimate  $\omega$  and  $\sigma$  by maximizing  $\ell$ .

**Algorithm  $\beta$ - $\gamma$ .** Initialize  $\sigma_t, t = 1, \dots, N$ . As before, we set  $\sigma_t$  to 0 (for  $\Theta_t$ ) if  $\phi_X < \frac{1}{2}$  or  $\phi_Y < \frac{1}{2}$ , or to 1 (for  $\Theta_t'$ ) otherwise.

- Step 1. Choose  $\hat{\omega}$  to maximize the log likelihood  $\ell$  (eq. 7) with the transforms  $\sigma$  fixed.
- Step 2. For  $t = 1, \dots, N$ , choose  $\sigma_t$  to maximize  $\ell_t(\hat{\omega}, \sigma_t(\Theta_t))$  with the hyper-parameters  $\omega$  fixed. In other words compare  $\Theta_t$  and  $\Theta_t'$  and choose the one that better fits the beta and gamma distributions.

Step 1 fits two beta and two gamma distributions by ML and involves four separate 2-D optimization problems. The maximum likelihood estimates (MLEs) of  $p$  and  $q$  for the beta distribution  $b(\phi; p, q)$  are functions of  $\sum_t \log \phi_t$  and  $\sum_t \log(1 - \phi_t)$ , whereas the MLEs of  $a$  and  $b$  for the gamma distribution  $g(\phi; a, b)$  are functions of  $\sum_t \phi_t$  and  $\sum_t \log \phi_t$ . These are simple optimization problems, which we solve using the BFGS algorithm in the PAML program (21). Step 2 involves  $N$  independent optimization problems, each comparing two points ( $\sigma_t = 0$  and 1), with  $\omega$  fixed. It is easy to see that the algorithm is nondecreasing (that is, the log likelihood  $\ell$  never decreases) and

converges, as step 1 involves ML estimation of parameters in the beta and gamma distributions, and step 2 involves comparing two points.

Note that algorithm  $\beta$ - $\gamma$  becomes algorithm CoG<sub>N</sub> if the beta and gamma densities are replaced by normal densities.

**Algorithms CoG<sub>0</sub>, CoG<sub>N</sub>, and  $\beta$ - $\gamma$  for the double-BDI model (fig. 6a).** Under the double-BDI model, there are four within-model unidentifiable towers, specified by eight parameters (eq. 2). Thus  $\sigma_t$  takes four values (0, 1, 2, 3). Let  $\Theta = (\phi_X, \phi_Y, \phi_Z, \phi_W, \theta_X, \theta_Y, \theta_Z, \theta_W)$ . We use the same strategy and fit four beta distributions to the  $\phi$ s and four gamma distributions to the  $\theta$ s, with 16 hyper-parameters in  $\omega$ . We implement the three algorithms ( $\beta$ - $\gamma$ , CoG<sub>N</sub>, and CoG<sub>0</sub>) as before. We prefer the tower in which the introgression probabilities are small and initialize the algorithm accordingly. The transforms ( $\sigma_t$ ) are as follows (eq. 2)

- $\sigma_t = 0$ : if the parameters are in  $\Theta_1$ , do nothing.
- $\sigma_t = 1$ : if in  $\Theta_2$ , let  $\phi_Z = 1 - \phi_Z$ ,  $\phi_W = 1 - \phi_W$ , and swap  $\theta_Z$  and  $\theta_W$ .
- $\sigma_t = 2$ : if in  $\Theta_3$ , let  $\phi_X = 1 - \phi_X$ ,  $\phi_Y = 1 - \phi_Y$ , swap  $\theta_X$  and  $\theta_Y$ , swap  $\phi_Z$  and  $\phi_W$ , swap  $\theta_Z$  and  $\theta_W$ ;
- $\sigma_t = 3$ : if in  $\Theta_4$ , let  $\phi_X = 1 - \phi_X$ ,  $\phi_Y = 1 - \phi_Y$ , swap  $\theta_X$  and  $\theta_Y$ , and let  $\phi_Z = 1 - \phi_Z$  and  $\phi_W = 1 - \phi_W$ .

The algorithms are implemented in C and require minimal computation and storage. Processing  $5 \times 10^5$  samples takes several seconds, mostly spent on reading and writing files. The algorithms are integrated into the BPP program (22) so that MCMC samples from various BDI models are post-processed and summarized automatically. We also provide a stand-alone program in the github repository `abacus-gene/bpp-msci-D-process-mcmc`.

## Results

### Introgression between *Heliconius melpomene* and *H. timareta*.

We fitted the BDI model of figure 2 to the genomic sequence data from three species of *Heliconius* butterflies: *H. melpomene*, *H. timareta*, and *H. numata* (14, 20). When we used the first 500 loci, either noncoding or exonic, there was substantial uncertainty in the posterior of  $\phi_X$  and  $\phi_Y$ , and the MCMC jumped between the twin towers, and the marginal posteriors had multiple modes, due to label switching (figs. 3a & S1a). Post processing of the MCMC sample using the new algorithms led to single-moded marginal posterior distributions (figs. 3b-d & S1b-d). The three algorithms produced extremely similar results for both datasets. For example, the posterior mean and 95% CI for  $\phi_X$  from the noncoding data were 0.356 (0.026, 0.671) by CoG<sub>0</sub>, 0.357 (0.026, 0.674) by CoG<sub>N</sub>, and 0.354 (0.022, 0.664) by  $\beta$ - $\gamma$ , while those for  $\phi_Y$  were 0.103 (0.000, 0.304) by CoG<sub>0</sub> and CoG<sub>N</sub>, and 0.104 (0.000, 0.306) by  $\beta$ - $\gamma$ .

We then analyzed all the 2592 noncoding and 3023 exonic loci on chromosome 1. With the large datasets, the parameters were better estimated with narrower CIs and the unidentifiable towers were well-separated. In fact, the MCMC visited only one of the two towers, but that tower was well explored so that multiple runs produced highly consistent results. We started the MCMC with small values for  $\phi_X$  and  $\phi_Y$ , and post-processing the MCMC samples had no effect.

Estimates of all parameters from the small (with  $L = 500$ ) and large datasets are summarized in table 1. In the small datasets, the introgression probabilities were  $\phi_X \approx 0.354$  (with the CI 0.022–0.664) for the noncoding data and 0.280 (with CI 0.002–0.547) for the coding loci, while  $\phi_Y$  was 0.104 (CI 0.000–0.306) for the coding data and 0.116 (CI 0.000–0.318) for the exonic data. When all loci from chromosome 1 were used,  $\phi_X$  was 0.124 (with the CI 0.007–0.243)

395 for the noncoding data and 0.161 (with CI 0.070–0.264) for the coding  
396 loci, while  $\varphi_Y$  was 0.048 (CI 0.000–0.139) for the coding data and  
397 0.019 (CI 0.000–0.056) for the exonic data. The estimates were similar  
398 between the coding and noncoding data, with greater proportions  
399 of migrants in *H. timareta* from *H. melpomene* than in the opposite  
400 direction. This was so despite the fact that *H. melpomene* had a smaller  
401 effective population size than *H. timareta*. Note that *H. melpomene*  
402 has a widespread geographical distribution whereas *H. timareta* is  
403 restricted to the Eastern Andes; the small  $\theta_M$  estimates are most likely  
404 due to the fact that the *H. melpomene* sample was from a partially  
405 inbred strain to avoid difficulties with genome assembly. Estimates  
406 of  $\theta$ s and  $\tau$ s were smaller for the coding loci than for the noncoding  
407 loci, due to selective constraint on nonsynonymous mutations.

408 Estimates of  $\varphi_X$  and  $\varphi_Y$  showed large differences between the  
409 small and large datasets, but they involved large uncertainties, with the  
410 CIs for large datasets mostly inside the CIs for the small datasets. One  
411 reason for the differences may be the variable rate of gene flow across  
412 the genome or chromosome. Note that  $\varphi$  in the MSci model reflects  
413 the long-term effects of gene flow and selection purging introgressed  
414 alleles, influenced by linkage to gene loci under natural selection.

415 **Analysis of data simulated under the double-BDI model of figure 6a.** We conducted a small simulation to illustrate the feasibility  
416 of the double-BDI model (fig. 6), simulating 10 replicate datasets of  
417  $L = 500, 2000,$  and  $8000$  loci. The three algorithms were used to  
418 process the MCMC samples, before they were summarized. A typical  
419 case is shown in figure 7 for the case of  $L = 500$ . While there are four  
420 unidentifiable towers in the 8-D posterior space (eq. 2), the MCMC  
421 visited only two of them, with different values for parameters around  
422 the ZW BDI event. The dataset of  $L = 500$  loci are very informative  
423 about the parameters for the recent BDI event at node XY ( $\varphi_X, \varphi_Y,$   
424  $\theta_X, \theta_Y$ ), so that these had highly concentrated posteriors with well  
425 separated towers. We started the Markov chains with small values  
426 (e.g., 0.1 and 0.2) for  $\varphi_X$  and  $\varphi_Y$ , so that the sampled points were all  
427 around the correct tower for those parameters. If the chain started with  
428 large  $\varphi_X$  and  $\varphi_Y$ , it would visit a ‘mirror’ tower. Thus post-processing  
429 of the MCMC samples in the case of  $L = 500$  mostly affected param-  
430 eters around the BDI event at ZW ( $\varphi_Z, \varphi_W, \theta_Z, \theta_W$ ). Figure 7  
431 shows the effects on parameters  $\varphi_Z$  and  $\varphi_W$  using the  $\beta$ - $\gamma$  algorithm.  
432 The CoG<sub>0</sub> and CoG<sub>N</sub> algorithms produced nearly identical results,  
433 and all algorithms were effective in removing label switching. The  
434 post-processed samples were summarized to calculate the posterior  
435 means and the HPD CIs (fig. 8).

437 At  $L = 2000$  or  $8000$  loci, the four towers were well-separated and  
438 the MCMC visited only one of them. Applying the post-processing al-  
439 gorithms either had no effect or, in rare occasions, moved all sampled  
440 points from another tower.

441 Posterior means and the 95% highest-probability-density (HPD)  
442 credibility intervals (CI) for all parameters were summarized in figure  
443 8. Parameters around the BDI event at ZW ( $\varphi_Z, \varphi_W, \theta_Z, \theta_W$ ) are the  
444 most difficult to estimate. Nevertheless, with the increase of data size,  
445 the CIs for all parameters become smaller, and the posterior means  
446 are converging to the true values. Note that while the simulation is  
447 conducted using one set of correct parameter values (say,  $\Theta_1$  of fig. 6),  
448 we consider the estimates to be good if they are close to any of the  
449 four towers (say,  $\Theta_2, \Theta_3,$  or  $\Theta_4$ ).

450 **Analysis of data simulated with one BDI event with poorly  
451 separated modes.** We simulated a more challenging dataset for the  
452 relabelling algorithms, with  $L = 500$  loci under the BDI model of  
453 figure 1a with parameter values  $(\varphi_X, \varphi_Y) = (0.7, 0.2)$  (see table S1).  
454 As  $\varphi_X$  and  $\varphi_Y$  are not too far away from  $\frac{1}{2}$  and the dataset is small,

455 the posterior modes are poorly separated, with considerable mass  
456 near  $(\frac{1}{2}, \frac{1}{2})$ . The unprocessed sample from BPP shows two modes  
457 for  $\varphi_Y$ , and one mode around  $\frac{1}{2}$  for  $\varphi_X$ , with the posterior means  
458 at 0.51 for  $\varphi_X$  and 0.50 for  $\varphi_Y$ , very close to  $\frac{1}{2}$  (fig. S6. These are  
459 misleading summaries, as the sample is affected by label switching.  
460 The three algorithms ( $\beta$ - $\gamma$ , CoG<sub>N</sub>, and CoG<sub>0</sub>) produce similar results,  
461 with single-moded posterior, around the mirror tower  $\Theta' = (0.3, 0.8)$ .  
462 The posterior means for  $\varphi_X$  are 0.245, 0.236, and 0.235, for the three  
463 algorithms ( $\beta$ - $\gamma$ , CoG<sub>N</sub>, and CoG<sub>0</sub>), and those for  $\varphi_Y$  are 0.553,  
464 0.539, and 0.538 (table S1). The three algorithms have worked well  
465 even when the posterior modes are poorly separated.

466 The parameters involved in the label switching,  $\varphi_X, \varphi_Y, \theta_X, \theta_Y,$   
467 are poorly estimated, due to the difficulty of separating the towers and  
468 to influence from the priors. The estimates should improve if more  
469 loci are used in the data. Other parameters in the model are all well  
470 estimated (table S1).

## 471 Discussion

472 **Identifiability and low information content of MSci models.** The  
473 identifiability of other MSci models implemented in BPP are simpler.  
474 MSci model A is consistent with three different biological scenarios  
475 (fig. 9a-c). In scenario A<sub>1</sub>, two species *SH* and *TH* merge to form  
476 a hybrid species *HC*, but the two parental species become extinct  
477 after the merge. This scenario may be rare. In scenario A<sub>2</sub>, species  
478 *SUX* contributes migrants to species *THC* at time  $\tau_H$  and has since  
479 become extinct or is unsampled in the data. In scenario A<sub>3</sub>, *TUX*  
480 is the ghost species. The three scenarios are unidentifiable using  
481 genomic data. Model B<sub>1</sub> assumes introgression from species *RA* to  
482 *TC* at time  $\tau_S = \tau_H$  (fig. 9d). This is distinguishable using genetic  
483 data from the alternative model B<sub>2</sub> in which there is introgression  
484 from *RB* to *SC* (B<sub>2</sub>, fig. 9e). Note that models B<sub>1</sub> and B<sub>2</sub> are both  
485 special cases of model A<sub>1</sub> with different constraints.

486 We note that there are many parameter settings and data configura-  
487 tions in which some parameters are hard to estimate, because the data  
488 lack information about them. For example, ancestral population sizes  
489 for short and deep branches in the species tree are hard to estimate,  
490 because most sequences sampled from modern species may have coalesced  
491 before reaching that population when we trace the genealogy  
492 of the sample backwards in time. Similarly, if not many sequences  
493 reach a hybridization node, there will be little information in the data  
494 about the introgression probabilities at that node. In such case, even if  
495 the model is identifiable mathematically, it may be nearly impossible  
496 to estimate the parameters with any precision even with large datasets.

497 In some cases, certain parameters may be very near the boundary  
498 of the parameter space, and this may create near unidentifiability  
499 with multiple modes in the posterior. For example, the introgression  
500 probability may be close to  $\varphi = 0$  or 1, or speciation events may have  
501 occurred in rapid succession so that the mother and daughter nodes on  
502 the species tree have nearly the same age) (see (15) for an example).  
503 The MCMC samples around different modes should be summarized  
504 separately.

505 **Estimation of introgression probabilities despite unidentifi-  
506 ability.** The three algorithms for post-processing MCMC samples  
507 under the BDI model produced very similar results in our applica-  
508 tions. In particular the simple center-of-gravity algorithms produced  
509 results as good as the more elaborate  $\beta$ - $\gamma$  algorithm, despite the fact  
510 the normal distribution is a poor approximation to the posterior of  
511 the introgression probabilities ( $\varphi_X$  and  $\varphi_Y$ ). This may be due to the  
512 fact that the distributions (or the distance in the CoG algorithms) are  
513 used to compare the sampled points with their unidentifiable mirror

514 points only, and are not used to directly approximate the posterior  
515 distribution of those parameters, which are estimated by using the  
516 processed samples. Similarly, while we fit independent distributions  
517 for parameters in the algorithms (eq. 6), there is no need to assume  
518 independence in the posterior for the algorithms to work. Further-  
519 more, if there exist multiple modes in the posterior that are not due to  
520 label-switching, such genuine multimodality will not be removed by  
521 the algorithms (18).

522 A model with a label-switching type of unidentifiability can still be  
523 applied in real data analysis. In the clustering problem, the Bayesian  
524 analysis may reveal the existence of two groups, in proportions  $p_1$  and  
525  $1 - p_1$  with means  $\mu_1$  and  $\mu_2$ , and it may not matter if it cannot decide  
526 which group should be called 'group 1'. The twin towers  $\Theta$  and  $\Theta'$   
527 under the BDI model of figure 1 constitute a mathematically similar  
528 label-switching problem. However,  $\Theta$  and  $\Theta'$  may represent different  
529 biological scenarios or hypotheses. Suppose that species  $A$  and  $B$  are  
530 distributed in different habitats (dry for  $A$  and wet for  $B$ , say), and  
531 suppose the ecological conditions have changed little throughout the  
532 history of the species.  $\Theta$  may mean that species  $A$  has been in the dry  
533 habitat over the whole time period since species divergence at time  
534  $\tau_R$ , while species  $B$  has been in the wet habitat, and they came into  
535 contact and exchanged migrants at time  $\tau_X$ . In contrast,  $\Theta'$  may mean  
536 that species  $A$  was in the wet habitat since species divergence while  
537 species  $B$  was in the dry habitat, but when they came into contact (at  
538 time  $\tau_X$ ) they nearly replaced each other, switching places, so that  
539 today species  $A$  is found in the dry habitat while species  $B$  in the  
540 wet habitat. The two sets of parameters  $\Theta$  and  $\Theta'$  may thus mean  
541 different biological hypotheses. The scenario of total replacement  
542 may be implausible for most systems, and in our algorithms, we start  
543 with the initial conditions  $\varphi_X < \frac{1}{2}$  and/or  $\varphi_Y < \frac{1}{2}$  as much as possible.  
544 When the introgression probabilities are intermediate, the biological  
545 interpretations may not be so clear-cut, but unidentifiability exists  
546 nevertheless. In the example of figure S6 and table S1, the choice  
547 between the two unidentifiable towers  $\Theta = (\varphi_X, \varphi_Y) = (0.7, 0.2)$  and  
548  $\Theta' = (0.3, 0.8)$  may not be easy. Ultimately, genomic data from mod-  
549 ern species provide information about the order and timings of species  
550 divergences and cross-species introgressions, but not about the geo-  
551 graphical locations and ecological conditions in which the divergences  
552 and introgressions occurred. Unidentifiable models discussed in this  
553 paper are all of this nature. The algorithms we developed in this paper  
554 remove label switching in the MCMC sample, but do not remove the  
555 unidentifiability of the BDI models. The researcher has to be aware  
556 of the unidentifiability or the equally supported explanations of the  
557 genomic data.

558 In the current implementation of BDI models in BPP, each branch  
559 in the species tree is assigned its own population size parameter (8).  
560 We note that if all species on the species tree are assumed to have  
561 the same population size ( $\theta$ ), unidentifiability persists. However,  
562 if we assume that the population size remains unchanged by the  
563 introgression event: e.g.,  $\theta_X = \theta_A$  and  $\theta_Y = \theta_B$  in figure 1, the model  
564 becomes identifiable. The assumption of the same population size  
565 before and after a migration event appears to be plausible biologically.  
566 It reduces the number of parameters by two for each BDI event, and  
567 removes unidentifiability. It may be worthwhile to implement such  
568 models. At any rate, the relabelling algorithms we have implemented  
569 makes it possible to apply the BDI models to genomic sequence data  
570 despite their unidentifiability.

## 571 Materials and Methods

**Introgression in *Heliconius* butterflies.** We fitted the BDI model to the genomic  
572 sequence data for three species of *Heliconius* butterflies: *H. melpomene*,  
573 *H. timareta*, and *H. numata* (23, 24). The species tree or MSci model as-  
574 sumed is shown in figure 2, with introgression between *H. melpomene* and  
575 *H. timareta*. The two species are known to hybridize, although no attempt has  
576 yet been made to infer the direction or magnitude of introgression (except for  
577 colour-pattern genes) (24). There are 31,166 autosomal noncoding loci and  
578 36,138 autosomal exonic loci, with 2592 noncoding and 3023 exonic loci on  
579 chromosome 1. We conducted two sets of analysis, using either the first 500  
580 loci or all the loci on chromosome 1.

581 We used gamma priors for the population sizes ( $\theta$ ) and for the age of the  
582 root ( $\tau_0$ ):  $\theta \sim G(2, 400)$  with the mean 0.005 substitution per site, and  $\tau \sim$   
583  $G(2, 400)$  with mean 0.005. The introgression probabilities were assigned beta  
584 priors  $\varphi \sim B(1, 1)$ , which is the uniform  $\mathbb{U}(0, 1)$ . We used a burn-in of 16000  
585 iterations, and then took  $2 \times 10^5$  samples, sampling every 5 iterations. Running  
586 time on a server with 9 threads of Intel Xeon Gold 6154 CPU (3.0GHz) was  
587 about 1 hour for the small datasets and 10 hours for the large ones.

588 Convergence of the MCMC algorithms was assessed by checking for  
589 consistency between independent runs, taking into account possible label-  
590 switching issues. In the large datasets analyzed in this paper, the MCMC  
591 typically visits only one of the unidentifiable towers, but that tower is well-  
592 explored, with the different runs producing highly consistent posterior  
593 label switching is removed. In such cases, reliable inference is possible  
594 (cf.:(19)).

**Simulation under the double-BDI model.** We simulated and analyzed data  
596 to under the double-BDI model of figure 6. We generated gene trees with  
597 branch lengths (coalescent times) and sequences under the JC model (25).  
598 The parameters used are  $\varphi_X = 0.1, \varphi_Y = 0.2, \varphi_Z = 0.2, \varphi_W = 0.3, \tau_R = 0.005,$   
599  $\tau_Z = \tau_W = 0.0025, \tau_X = \tau_Y = 0.00125, \theta_R = \theta_Z = \theta_X = \theta_A = 0.005,$   
600 and  $\theta_W = \theta_Y = \theta_B = 0.02$ . Each dataset consists of  $L = 500, 2000$  and  $8000$  loci,  
601 with  $S = 16$  sequences per species per locus, and with the sequence length to  
602 be 500 sites. The number of replicate datasets is 10.

603 The data were then analyzed using BPP under the double-BDI model  
604 (fig. 6) to estimate the 14 parameters. We use gamma priors  $\tau_0 \sim G(2, 400)$   
605 for the root age with the mean to be the true value (0.005), and  $\theta \sim G(2, 200)$   
606 with the mean 0.01 (true values are 0.005 and 0.02). We used a burn-in of  
607 32,000 iterations, and then took  $5 \times 10^5$  samples, sampling every 2 iterations.  
608 Analysis of each dataset took  $\sim 10$ hrs for  $L = 500$  and  $\sim 130$ hrs for  $L = 8000$ ,  
609 using 8 threads on a server. The MCMC samples were processed to remove  
610 label-switching before they are summarized to approximate the posterior  
611 distribution.

**ACKNOWLEDGMENTS.** We thank James Mallet and Fernando Seixas  
613 for providing the genomic datasets for the *Heliconius* butterflies, and James  
614 Mallet for comments on an earlier draft of the paper. This study has been  
615 supported by Biotechnology and Biological Sciences Research Council grant  
616 (BB/T003502/1) and a BBSRC equipment grant (BB/R01356X/1).

- 617 1. RG Harrison, EL Larson, Hybridization, introgression, and the nature of species boundaries. *J. Hered.* **105** (S1), 795–809 (2014).
- 618 2. J Mallet, N Besansky, MW Hahn, How reticulated are species? *BioEssays* **38**, 140–149 (2016).
- 619 3. JH Degnan, Modeling hybridization under the network multispecies coalescent. *Syst. Biol.* **67**, 786–799 (2018).
- 620 4. RAL Elworth, HA Ogilvie, J Zhu, L Nakhleh, Advances in computational methods for phylogenetic networks in the presence of hybridization in *Bioinformatics and Phylogenetics*. (Springer) Vol. 29, pp. 317–360 (2019).
- 621 5. X Jiao, T Flouri, Z Yang, Multispecies coalescent and its applications to infer species phylogenies and cross-species gene flow. *Nat. Sci. Rev.* (2021) DOI:10.1093/nsr/nwab127.
- 622 6. D Wen, L Nakhleh, Coestimating reticulate phylogenies and gene trees from multilocus sequence data. *Syst. Biol.* **67**, 439–457 (2018).
- 623 7. C Zhang, HA Ogilvie, AJ Drummond, T Stadler, Bayesian inference of species networks from multilocus sequence data. *Mol. Biol. Evol.* **35**, 504–517 (2018).
- 624 8. T Flouri, X Jiao, B Rannala, Z Yang, A Bayesian implementation of the multispecies coalescent model with introgression for phylogenomic analysis. *Mol. Biol. Evol.* **37**, 1211–1223 (2020).
- 625 9. Y Yu, JH Degnan, L Nakhleh, The probability of a gene tree topology within a phylogenetic network with applications to hybridization detection. *PLoS Genet.* **8**, e1002660 (2012).
- 626 10. F Pardi, C Scornavacca, Reconstructible phylogenetic networks: do not distinguish the indistinguishable. *PLoS Comput. Biol.* **11**, e1004135 (2015).
- 627 11. S Zhu, JH Degnan, Displayed trees do not determine distinguishability under the network multispecies coalescent. *Syst. Biol.* **66**, 283–298 (2017).
- 628 12. C Solis-Lemus, A Coen, C Ane, On the identifiability of phylogenetic networks under a pseudolikelihood model. *ArXiv* (2020).
- 629 13. T Zhu, Z Yang, Complexity of the simplest species tree problem. *Mol. Biol. Evol.* (2021) DOI: 10.1093/molbev/msab009.
- 630 640
- 641
- 642
- 643
- 644

- 645 14. Y Thawornwattana, J Mallet, Z Yang, Complex introgression history of the erato-sara clade of  
 646 heliconius butterflies. *bioRxiv* (2021).  
 647 15. N Finger, et al., Genome-scale data reveal deep lineage divergence and a complex demo-  
 648 graphic history in the texas horned lizard (*Phrynosoma cornutum*) throughout the southwestern  
 649 and central usa. *Genome Biol. Evol.* (2021).  
 650 16. S Richardson, P Green, On Bayesian analysis of mixtures with an unknown number of  
 651 components (with discussions). *J. R. Stat. Soc. B* **59**, 731–792 (1997).  
 652 17. G Celeux, M Hurn, C Robert, Bayesian inference for mixture: the label switching problem in  
 653 *COMPSTAT*, eds. R Payne, P J Green. (Physica, Heidelberg), pp. 227–232 (1998).  
 654 18. M Stephens, Dealing with label switching in mixture models. *J. R. Stat. Soc. B.* **62**, 795–809  
 655 (2000).  
 656 19. A Jasra, CC Holmes, DA Stephens, Markov chain Monte Carlo methods and the label switching  
 657 problem in Bayesian mixture modeling. *Stat. Sci.* **1**, 50–67 (2005).  
 658 20. NB Edelman, et al., Genomic architecture and introgression shape a butterfly radiation.  
 659 *Science* **366**, 594–599 (2019).  
 660 21. Z Yang, Paml 4: Phylogenetic analysis by maximum likelihood. *Mol. Biol. Evol.* **24**, 1586–1591  
 661 (2007).  
 662 22. T Flouri, X Jiao, B Rannala, Z Yang, Species tree inference with BPP using genomic sequences  
 663 and the multispecies coalescent. *Mol. Biol. Evol.* **35**, 2585–2593 (2018).  
 664 23. GC Heliconius, Butterfly genome reveals promiscuous exchange of mimicry adaptations  
 665 among species. *Nature* **487**, 94–98 (2012).  
 666 24. SH Martin, et al., Genome-wide evidence for speciation with gene flow in *Heliconius* butterflies.  
 667 *Genome Res.* **23**, 1817–1828 (2013).  
 668 25. T Jukes, C Cantor, Evolution of protein molecules in *Munro, H.N., ed. Mammalian Protein*  
 669 *Metabolism*. (Academic Press, New York), pp. 21–123 (1969).

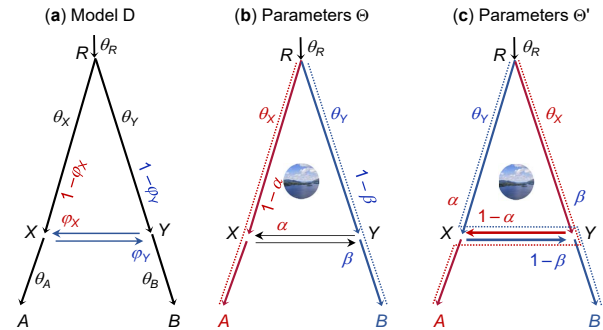

**Fig. 1.** (a) Bidirectional introgression model or model D (8) assumes introgression in both directions between species *A* and *B* at time  $\tau_X = \tau_Y$ . (b) and (c) Two sets of parameters  $\Theta$  and  $\Theta'$ , with the same parameter values except that  $\phi'_X = 1 - \phi_X$ ,  $\phi'_Y = 1 - \phi_Y$ ,  $\theta'_X = \theta_Y$ , and  $\theta'_Y = \theta_X$ . The dotted lines indicate the main routes taken by sequences sampled from species *A* and *B*, if both introgression probabilities  $\alpha$  and  $\beta$  are  $\ll \frac{1}{2}$ .

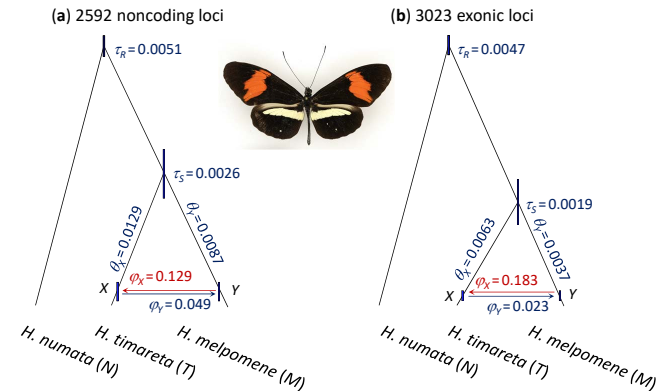

**Fig. 2.** Species tree and BDI model for *Heliconius melpomene*, *H. timareta*, and *H. numata*. The branch lengths are drawn to represent the estimated species divergence times (posterior means) using the noncoding and exonic loci from chromosome 1, while the node bars represent the 95% HPD CIs. See table 1 for estimates of other parameters. Photo of *H. timareta* courtesy of James Mallet.

**Table 1. Posterior means and 95% HPD CIs (in parentheses) for parameters in the BDI model of figure 2 for the *Heliconius* data**

|                   | Noncoding, $L = 500$ | Noncoding, $L = 2592$ | Exonic, $L = 500$    | Exonic, $L = 3023$   |
|-------------------|----------------------|-----------------------|----------------------|----------------------|
| $\tau_R$          | 4.73 (4.33, 5.13)    | 5.10 (4.89, 5.30)     | 4.39 (3.98, 4.81)    | 4.71 (4.54, 4.88)    |
| $\tau_S$          | 3.12 (2.05, 4.19)    | 2.58 (2.12, 3.05)     | 1.95 (1.07, 2.82)    | 1.78 (1.38, 2.19)    |
| $\tau_X = \tau_Y$ | 0.62 (0.21, 1.02)    | 0.25 (0.09, 0.40)     | 0.20 (0.03, 0.37)    | 0.13 (0.05, 0.24)    |
| $\theta_M$        | 1.50 (0.62, 2.34)    | 0.69 (0.35, 1.10)     | 0.38 (0.08, 0.70)    | 0.32 (0.14, 0.52)    |
| $\theta_T$        | 2.55 (1.40, 3.74)    | 1.23 (0.65, 1.84)     | 0.79 (0.13, 1.28)    | 0.63 (0.32, 0.94)    |
| $\theta_N$        | 15.1 (12.0, 18.5)    | 23.0 (20.3, 25.7)     | 11.2 (9.11, 13.5)    | 12.4 (11.4, 13.4)    |
| $\theta_R$        | 5.08 (4.12, 6.05)    | 5.74 (5.23, 6.24)     | 5.76 (4.83, 6.70)    | 6.68 (6.24, 7.11)    |
| $\theta_S$        | 4.62 (1.85, 7.40)    | 6.92 (5.48, 8.37)     | 5.31 (3.38, 7.36)    | 7.50 (6.51, 8.49)    |
| $\theta_X$        | 11.4 (2.83, 21.2)    | 12.9 (7.35, 19.6)     | 8.04 (1.67, 15.4)    | 5.80 (3.60, 8.36)    |
| $\theta_Y$        | 6.78 (2.42, 11.6)    | 8.74 (5.69, 12.0)     | 4.03 (0.60, 7.51)    | 3.49 (2.56, 4.50)    |
| $\phi_X$          | 0.354 (0.022, 0.664) | 0.124 (0.007, 0.243)  | 0.280 (0.002, 0.547) | 0.161 (0.070, 0.264) |
| $\phi_Y$          | 0.104 (0.000, 0.306) | 0.048 (0.000, 0.139)  | 0.116 (0.000, 0.318) | 0.019 (0.000, 0.056) |

Note.— Estimates of  $\tau$ s and  $\theta$ s are multiplied by  $10^3$ . MCMC samples are processed using the  $\beta$ - $\gamma$  algorithm before they are summarized.

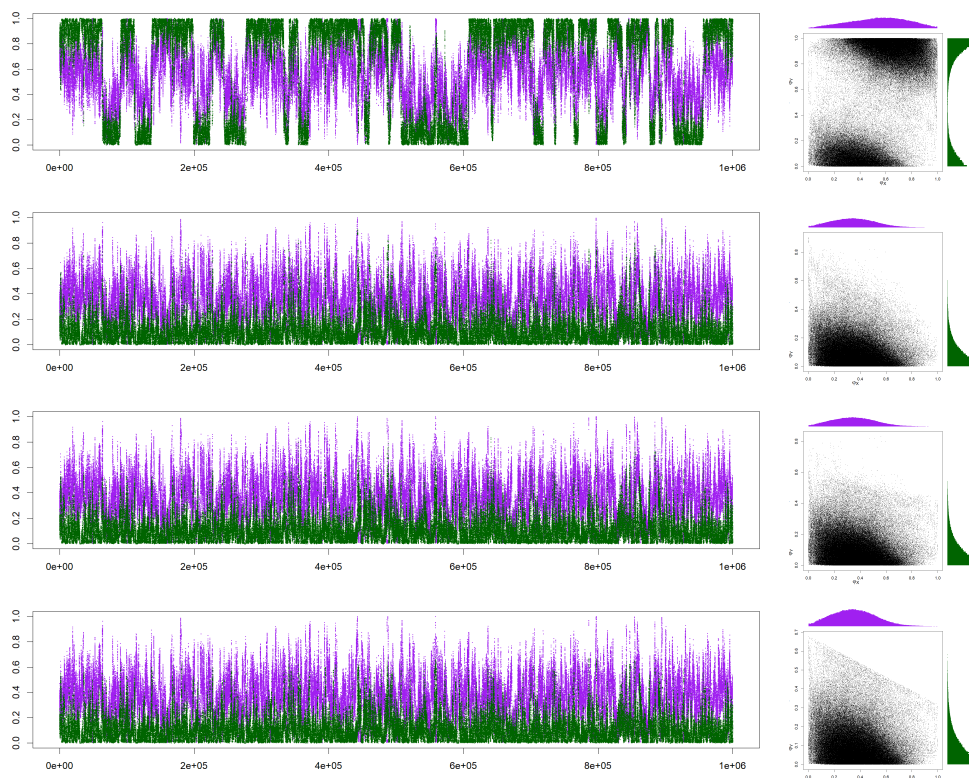

**Fig. 3.** Trace plots of MCMC samples and 2-D scatter plots for parameters  $\phi_X$  (purple) and  $\phi_Y$  (green) before (top) and after (bottom three) the post-processing of the MCMC sample in the BPP analysis of the first 500 noncoding loci from chromosome 1 of the *Heliconius* data under the MSci model of figure 2. The three algorithms used are  $\beta$ - $\gamma$ ,  $\text{CoG}_Y$ , and  $\text{CoG}_0$ .



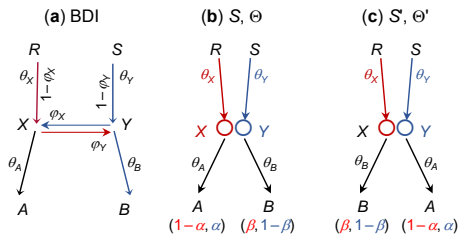

**Fig. 4.** The rule of BDI unidentifiability. (a) In the BDI model, species  $RA$  and  $SB$  exchange migrants at time  $\tau_X = \tau_Y$ . Treat  $X$  and  $Y$  as one node with left parent  $RX$  with population size  $\theta_X$  and right parent  $SY$  with population size  $\theta_Y$ . When a sequence from  $A$  reaches  $XY$ , it takes the left and right parental paths with probabilities  $1 - \phi_X$  and  $\phi_X$ , respectively. When a sequence from  $B$  reaches  $XY$ , it goes left and right with probabilities  $\phi_Y$  and  $1 - \phi_Y$ , respectively. (b & c) Placing the two daughters in the order  $(A, B)$  as in  $\Theta$  or  $(B, A)$  as in  $\Theta'$  does not affect the distribution of gene trees, and constitutes unidentifiable towers in the posterior space. If  $X$  and  $Y$  are sister species and have the same mother node (with  $R$  and  $S$  to be the same node), the unidentifiability is within-model; otherwise it is cross-model.

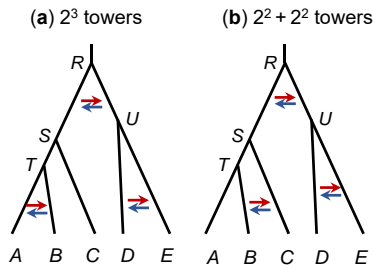

**Fig. 5.** (a) Three BDI events between sister species creating  $2^3 = 8$  within-model towers in the posterior. (b) Two BDI events between sister species and one BDI event between non-sister species creating two unidentifiable models each with four within-model unidentifiable towers in the posterior space.

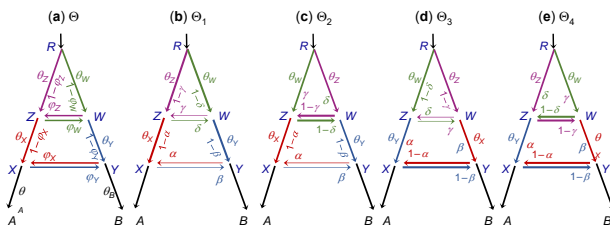

**Fig. 6.** Double-BDI model between two species  $A$  and  $B$ , with four within-model towers ( $\Theta_1$ ,  $\Theta_2$ ,  $\Theta_3$ , and  $\Theta_4$ ). (a) The parameters in the model include 7  $\theta$ s, 3  $\tau$ s, and 4  $\phi$ s, with 14 parameters in total. (b)-(e) Four unidentifiable towers showing the mappings of parameters (eq. 2). To apply the rule of figure 4, we treat each pair of BDI nodes as one node, so that  $X$  and  $Y$  have the same node  $ZW$  as the parent, and the unidentifiability caused by the BDI event at nodes  $X$ - $Y$  is within-model, as is the unidentifiability for the BDI event at nodes  $Z$ - $W$ .

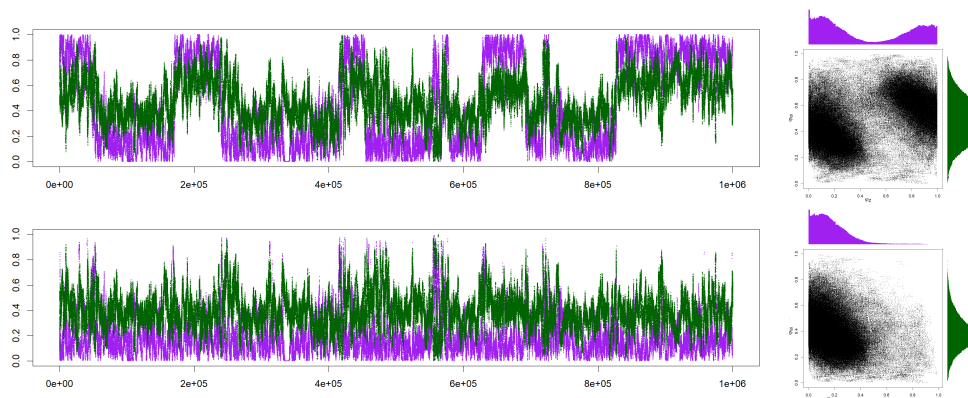

**Fig. 7.** Trace plots of MCMC samples and 2-D scatter plots for parameters  $\varphi_Z$  (purple) and  $\varphi_W$  (green) before (top) and after (bottom) the post-processing of the MCMC samples for the double-DBI model of figure 6a. Post processing used the  $\beta$ - $\gamma$  algorithm, while  $\text{CoG}_V$  and  $\text{CoG}_0$  produced nearly identical results (not shown). This is for replicate 2 for  $L = 500$  loci.

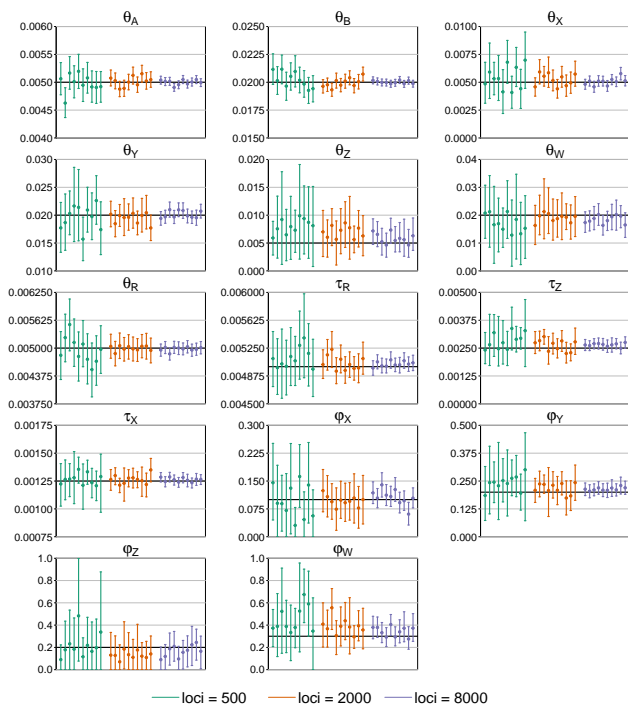

**Fig. 8.** Posterior means and the 95% HPD CIs in 10 replicate datasets of  $L = 500, 2000,$  and  $8000$  loci, simulated and analyzed under the double-BDI model of figure 6a. The MCMC samples are post-processed using the  $\beta$ - $\gamma$  algorithm before they are summarized.

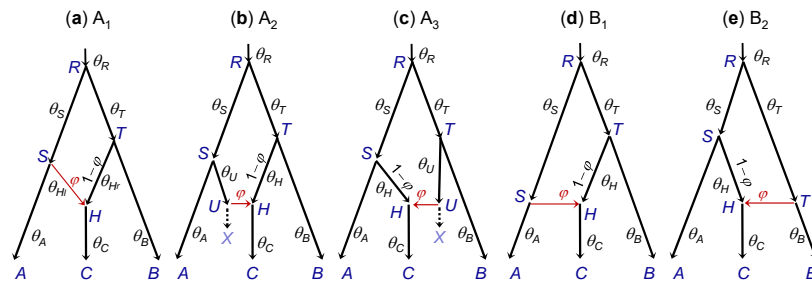

**Fig. 9.** (a-c) Three interpretations of MSci model A are indistinguishable/unidentifiable. (d, e) Two versions of MSci model B are identifiable.

670 **Supporting Information (SI).**

- 671 • Figure S1: Analysis of the first 500 exonic loci of the *Heliconius* data.
- 672 • Figure S2: Three models with a BDI event between sister species.
- 673 • Figure S3: Two models with a BDI event between nonsister species.
- 674 • Figure S4: Three models with a BDI event between nonsister species.
- 675 • Figure S5: Two BDI events between non-sister species creating four
- 676 unidentifiable models.
- 677 • Figure S6: Trace plots for  $\phi_X$  and  $\phi_Y$  in analysis of a dataset of  $L = 500$
- 678 loci simulated under the BDI model of figure 1.
- 679 • Table S1: Posterior means and 95% HPD CIs for parameters in the BDI
- 680 model from a simulated data of  $L = 500$  loci.

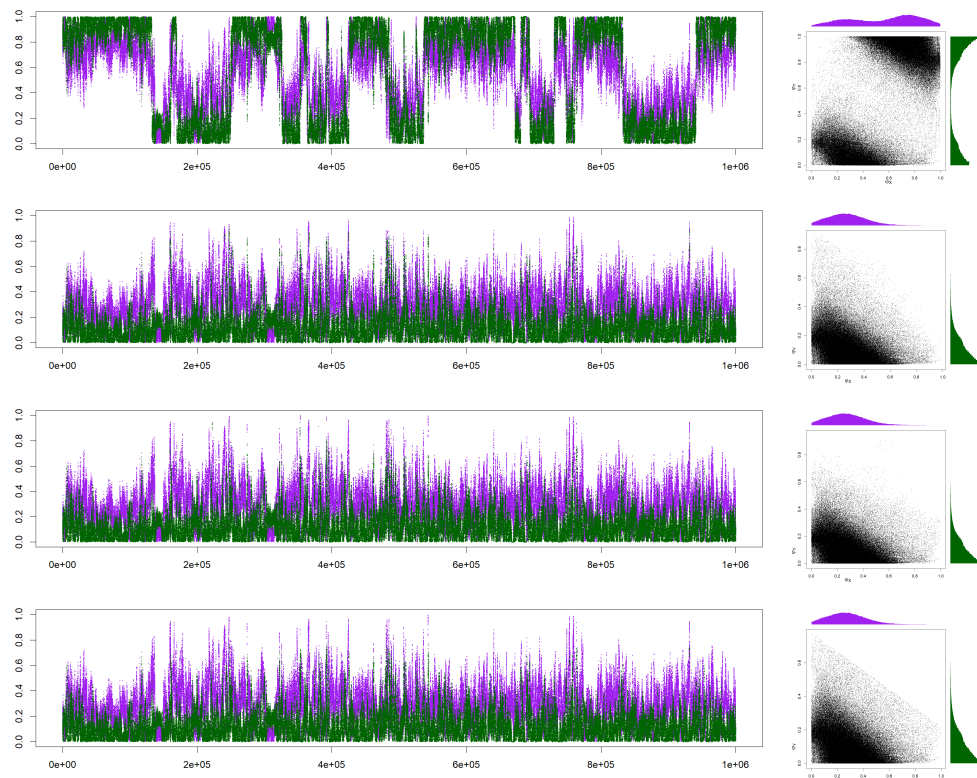

**Fig. S1.** Analysis of the first 500 exonic loci on chromosome 1 from the *Heliconius* data. See legend to figure 3.

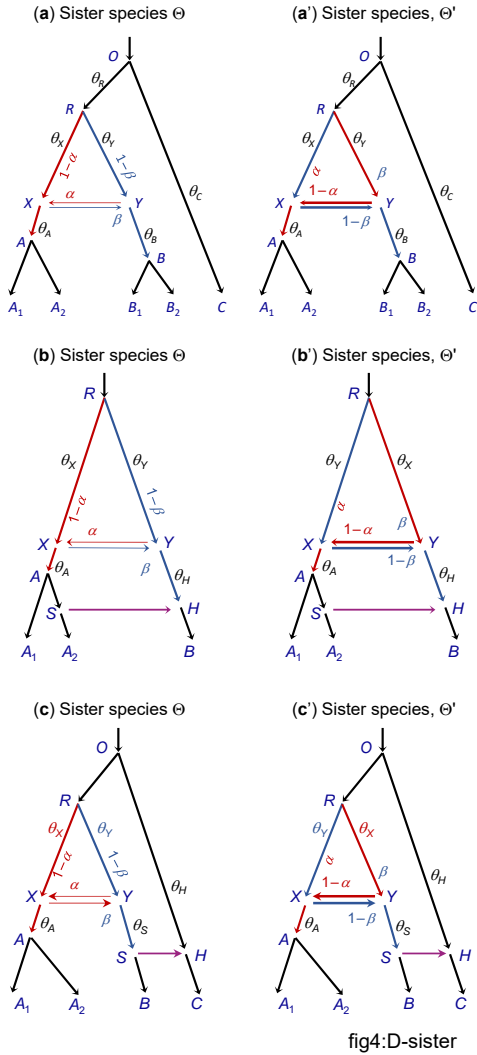

**Fig. S2.** Three models, each involving a BDI event between sister species, creating within-model unidentifiability. (a) & a') Subtrees are added to branches A, B, and R in the basic model of figure 1a. (b) & b') A BDI event between sister species X and Y with a unidirectional introgression involving descendant branches of X and Y. (c) and c') A BDI event between sister species X and Y with a unidirectional introgression involving one descendant branch and another branch that is not a descendant of X or Y. In all three cases, the parameter mapping is  $\phi'_X = 1 - \phi_X$ ,  $\phi'_Y = 1 - \phi_Y$ ,  $\theta'_X = \theta_Y$ , and  $\theta'_Y = \theta_X$ .

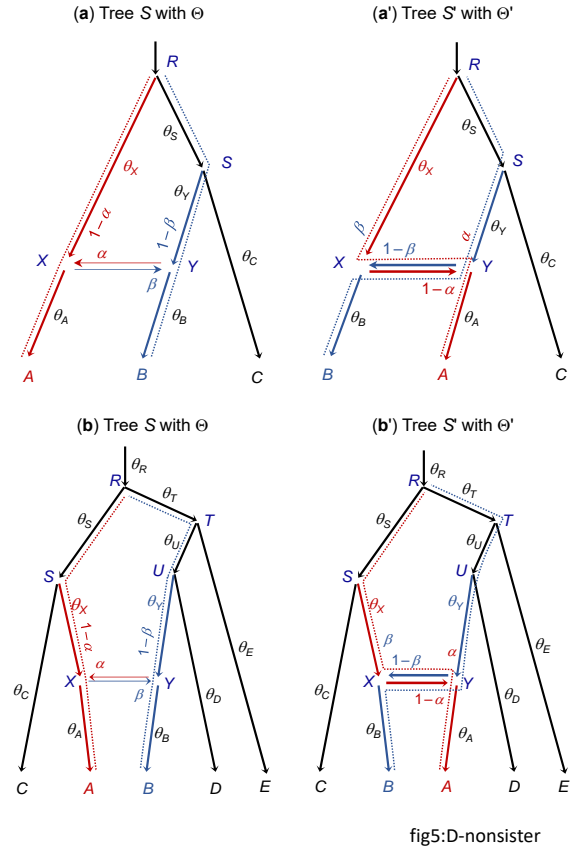

**Fig. S3.** BDI between non-sister species creates cross-model unidentifiability. (a & a') A pair of unidentifiable models with a BDI event between non-sister species. The dotted lines indicate the main routes taken by sequences sampled from species A and B, if the introgression probabilities  $\alpha$  and  $\beta$  are  $< \frac{1}{2}$ . (b & b') Another pair of unidentifiable models with a BDI event between non-sister species. The parameter mapping from  $\Theta$  to  $\Theta'$  in both cases is  $\phi'_X = 1 - \phi_Y$  and  $\phi'_Y = 1 - \phi_X$ , with all other parameters (such as  $\theta_X$ ,  $\theta_Y$ ,  $\theta_A$ , and  $\theta_B$ ) to be identical between  $\Theta$  and  $\Theta'$ .

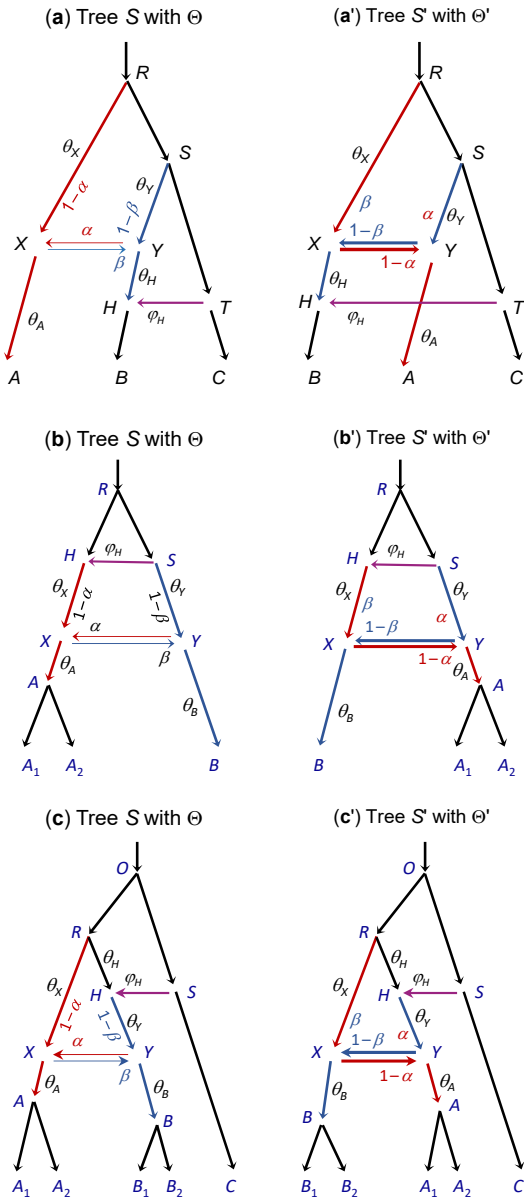

fig6:D-nonsister2

**Fig. S4.** Three pairs of unidentifiable models with one BDI event between non-sister species, illustrating the mapping of parameters ( $\Theta$  and  $\Theta'$ ). In (a),  $RXA$  and  $SYH$  are non-sister species. In (b & c), nodes  $X$  and  $Y$  are non-sister species because of the unidirectional introgression event involving branches  $RX$  and/or  $RY$ . The mirror model ( $S'$  with  $\Theta'$ ) is generated by pruning off branches  $AX$  at  $X$  and  $BY$  at  $Y$ , swapping places and reattaching, and applying the mapping  $\phi'_X = 1 - \phi_Y$  and  $\phi'_Y = 1 - \phi_X$ .

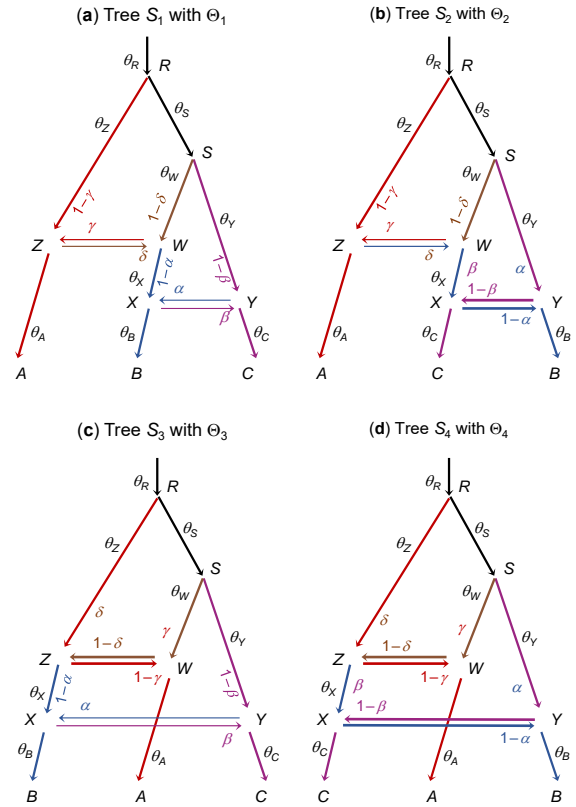

fig9:D-D-2

**Fig. S5.** Two BDI events involving non-sister species on a species tree for three species creating four unidentifiable models. The cross-model parameter mappings concern only the introgression probabilities  $\phi_X \equiv \alpha$ ,  $\phi_Y \equiv \beta$ ,  $\phi_Z \equiv \gamma$ , and  $\phi_W \equiv \delta$ , while all other parameters are the same among the models. The colored lines indicate the main routes taken by sequences sampled from  $A$  (red),  $B$  (blue), and  $C$  (purple), if the introgression probabilities  $\alpha$ ,  $\beta$ ,  $\gamma$ , and  $\delta$  are all  $< \frac{1}{2}$ , from which the unidentifiability of the four models can be seen easily.

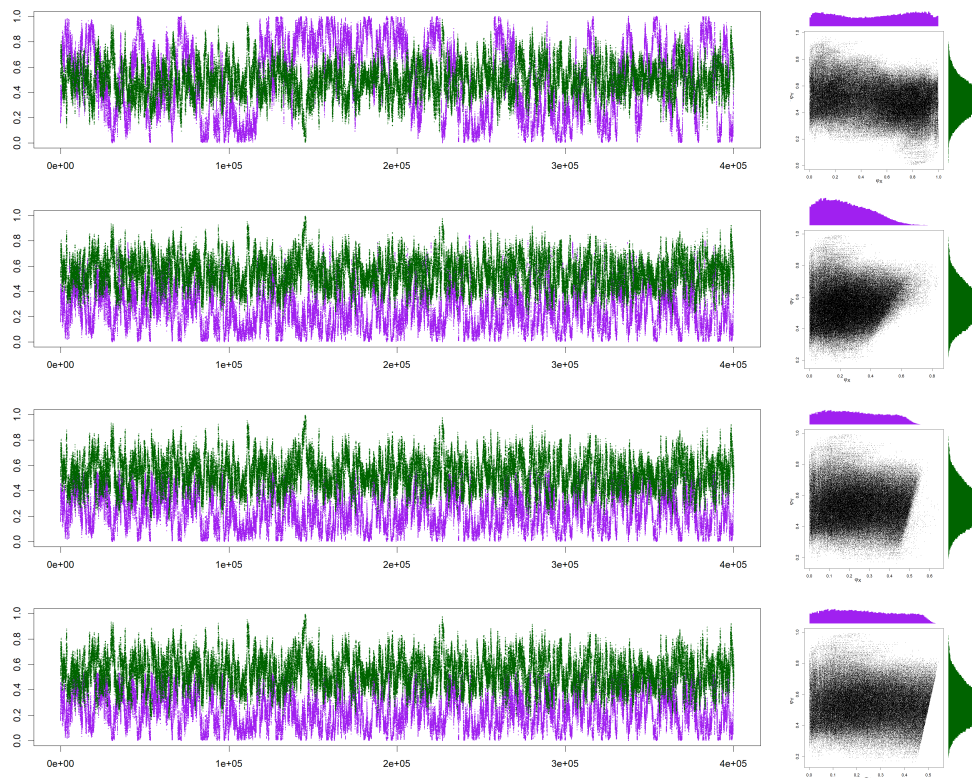

**Fig. S6.** Trace plots of MCMC samples for  $\phi_X$  and  $\phi_Y$  and 2-D scatter plots from BPP analysis of a dataset of  $L = 500$  loci simulated under the BDI model of figure 1a. See table S1 for the true parameter values and posterior summaries. The plots are for, from top to bottom, unprocessed sample and processed samples using the  $\beta$ - $\gamma$ ,  $\text{CoG}_N$ , and  $\text{CoG}_0$  algorithms. The true parameter values are  $\Theta = (\phi_X, \phi_Y) = (0.7, 0.2)$ , and the post-processing using all three algorithms mapped the samples to the mirror tower around  $\Theta' = (0.3, 0.8)$ .

**Table S1.** Posterior means and 95% HPD CIs (in parentheses) for parameters in the MSci model of figure 1a from a simulated dataset of  $L = 500$  loci

|                   | truth ( $\Theta$ ) | mirror ( $\Theta'$ ) | beta-gamma              | $\text{CoG}_N$          | $\text{CoG}_0$          |
|-------------------|--------------------|----------------------|-------------------------|-------------------------|-------------------------|
| $\tau_R$          | 0.01               |                      | 0.0098 (0.0088, 0.0108) |                         |                         |
| $\tau_X = \tau_Y$ | 0.005              |                      | 0.0050 (0.0045, 0.0055) |                         |                         |
| $\theta_A$        | 0.002              |                      | 0.0020 (0.0018, 0.0021) |                         |                         |
| $\theta_B$        | 0.01               |                      | 0.0101 (0.0093, 0.0108) |                         |                         |
| $\theta_R$        | 0.002              |                      | 0.0020 (0.0006, 0.0034) |                         |                         |
| $\theta_X$        | 0.002              | 0.01                 | 0.0071 (0.0022, 0.0124) | 0.0067 (0.0017, 0.0120) | 0.0068 (0.0017, 0.0121) |
| $\theta_Y$        | 0.01               | 0.002                | 0.0063 (0.0005, 0.0130) | 0.0066 (0.0005, 0.0133) | 0.0066 (0.0005, 0.0133) |
| $\phi_X$          | 0.7                | 0.3                  | 0.245 (0.001, 0.528)    | 0.236 (0.001, 0.472)    | 0.235 (0.001, 0.470)    |
| $\phi_Y$          | 0.2                | 0.8                  | 0.553 (0.330, 0.791)    | 0.539 (0.305, 0.786)    | 0.538 (0.305, 0.788)    |

Note.— Empty cells mean the same values as on the left. MCMC samples are processed using the three algorithms and then summarized. See figure S6 for the tracecatter plots. The dataset of  $L = 500$  loci, each consisting of four sequences per species (or eight sequences per locus) and 500 sites per sequence, is simulated using the true parameter values ( $\Theta$ ).
